# Supplementary material for: Metal-ion responsive reversible assembly of DNA origami dimers: G-quadruplex induced intermolecular interaction
Source: Royal Society of Chemistry journal article supplement (doi:10.1039/c7nr09458b), 2018-01-01
Supplement: c7nr09458b1.pdf [file c7nr09458b1.pdf]

## Supplementary Information

### **Metal-Ion Responsive Reversible Assembly of DNA Origami Dimers: G-Quadruplex Induced Intermolecular Interaction**

*Shuo Yang,<sup>a</sup> Wenyan Liu,<sup>b</sup> Rachel Nixon,<sup>a</sup> and Risheng Wang<sup>\*a</sup>*

<sup>a</sup>Department of Chemistry, Missouri University of Science and Technology, Rolla, MO 65409, United States

<sup>b</sup>Center for Research in Energy and Environment, Missouri University of Science and Technology, Rolla, MO 65409, United States

\*E-mail: wangri@mst.edu

## **Materials and methods**

### **Materials**

All chemicals were purchased from Sigma and used as received without further purification. All chemically synthesized DNA strands were purchased from Integrated DNA Technologies, Inc. ([www.IDTdna.com](http://www.IDTdna.com)). The unmodified staple strands were ordered in a 96-well plate format, suspended in ultrapure water without purification. All modified strands were purified with PAGE. The DNA origami purification column (100kDa MWCO centrifuge filter) was purchased from Pall, Inc.

### **Experimental Section**

#### **Assembly/disassembly of DNA origami nanostructures**

M13mp18 viral DNA and all of the staple strands were mixed together at a 1:5 ratio, in a 1× TAE buffer solution containing 40 mM Tris-HCl, 20 mM of acetic acid, 2 mM of EDTA, and 11.5 mM of magnesium acetate. The mixture was slowly cooled from 90°C to 15°C with PCR over 12h. The final concentration of M13mp18 DNA in the solution was 20 nM. The DNA origami was then purified to remove excess DNA strands, using 100kDa MWCO centrifuge filters.

Formation of DNA origami dimer: The prepared DNA origami monomers were mixed at a molar ratio of 1:1 in a 1×TAE buffer containing 11.5 mM of magnesium acetate. Then, the mixture was annealed from 53°C to 15°C over varied time course from 2h to 12h to form the corresponding DNA origami dimers (Figure S1). The separation of the origami dimer was accomplished by adding varied concentration of potassium chloride or sodium chloride in the solution of DNA origami dimer and incubating at a temperature ranging from 53°C to 15°C over 12 h time course. A 100kDa MWCO centrifuge filter was used to exchange the reaction buffer.

### **AFM imaging**

The AFM images of the DNA origami dimer and monomer were obtained through spotting the sample (3  $\mu$ l) onto freshly cleaved muscovite mica (Ted Pella, Inc.) for 15 s. After the fixation of targeted structure of DNA origami on mica surface, doubly distilled H<sub>2</sub>O (20-30ul) was placed quickly on the mica to remove the buffer salts, the drop was wicked off, and the sample was dried with compressed air. Atomic force imaging was done by utilizing Nanoscope III (Digital Instruments) tapping in air, with ultra-sharp 14 series (NSC 14) tips that had been purchased from NANOANDMORE.

### **Agarose Gel Electrophoresis**

The samples were loaded into 0.8% agarose gel that contained 5 mM Mg(CH<sub>3</sub>COO)<sub>2</sub>, 20 mM KCl or NaCl in a 1 $\times$ TAE buffer solution under 55V at room temperature. The gel was stained with ethidium bromide for DNA visualization.

## Supporting Figures

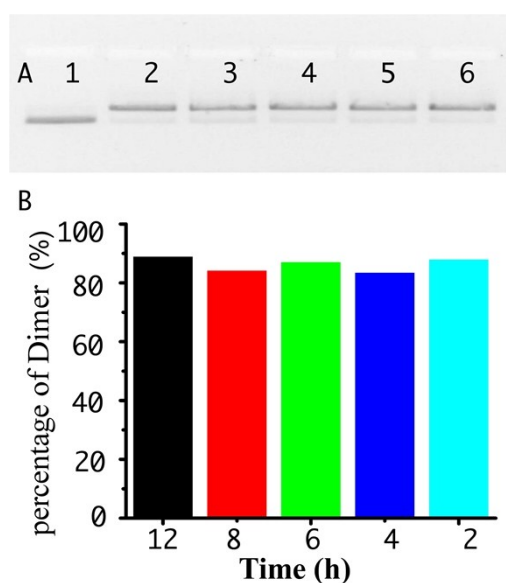

**Figure S1.** (A) Agarose gel electrophoresis image of assembly of DNA origami dimer with varied annealing period (design corresponding to Figure 1A). Lane 1: DNA origami monomer. Lane 2 to lane 6: corresponding to the annealing period from 12 h, 8 h, 6h, 4h to 2 h respectively. (B) The quantification of band intensity in an agarose gel image (shown in Figure S1A). There is no time-dependence in the formation of DNA origami dimer.

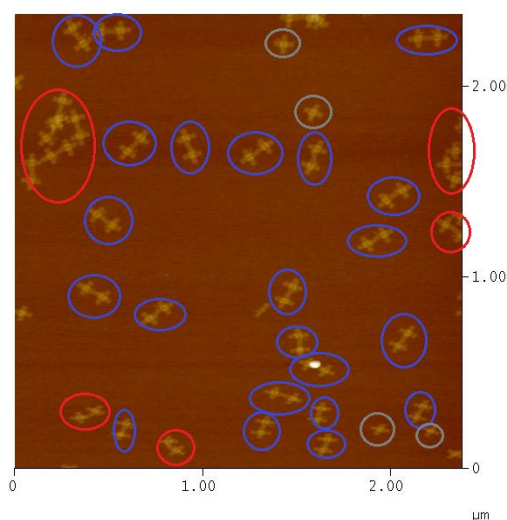

**Figure S2.** An example of an AFM image used to calculate the yield of a DNA origami dimer with the design shown in Figure 1. The blue circles represent a DNA origami dimer; the grey circles represent DNA origami monomer; and the red circles represent the non-counted DNA origami aggregations. The final yield is the average yield of each image.

The following equation was used to calculate the yield of the DNA origami dimer:

$$\% \text{ Yield} = \frac{\text{Number of DNA origami dimers} \times 2}{\text{total number of DNA origami}} \times 100$$

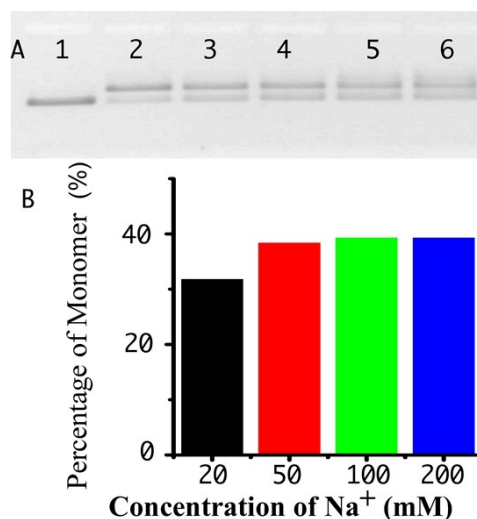

**Figure S3.** (A) Agarose gel electrophoresis image of dissociation of a DNA origami dimer with different concentrations of Sodium (design corresponding to Figure 1A). Lane 1: DNA origami monomer. Lane 2: DNA origami dimer before Na<sup>+</sup> treatment. Lane 3 to Lane 6 : DNA origami dimer treated with varied concentrations of Na<sup>+</sup>, 20 mM, 50 mM, 100 mM, 200 mM, respectively. (B) The quantification of band intensity in an agarose gel image (shown in Figure S3A).

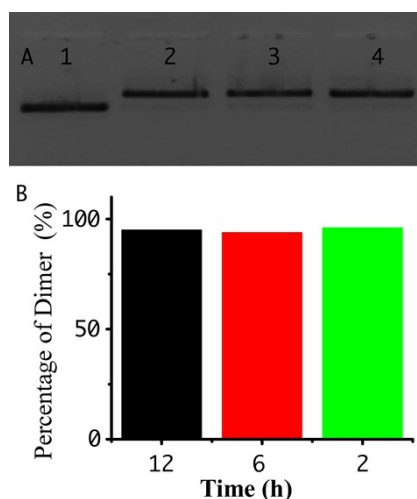

**Figure S4.** (A) Agarose gel electrophoresis image of assembly of DNA origami dimer with varied annealing period (design corresponding to Figure 4A). Lane 1: DNA origami monomer. Lane 2 to lane 4: corresponding to the annealing period from 12 h, 6h, to 2 h respectively. (B) The quantification of band intensity in an agarose gel image (shown in Figure S4A). There is no time-dependence in the formation of DNA origami dimer.

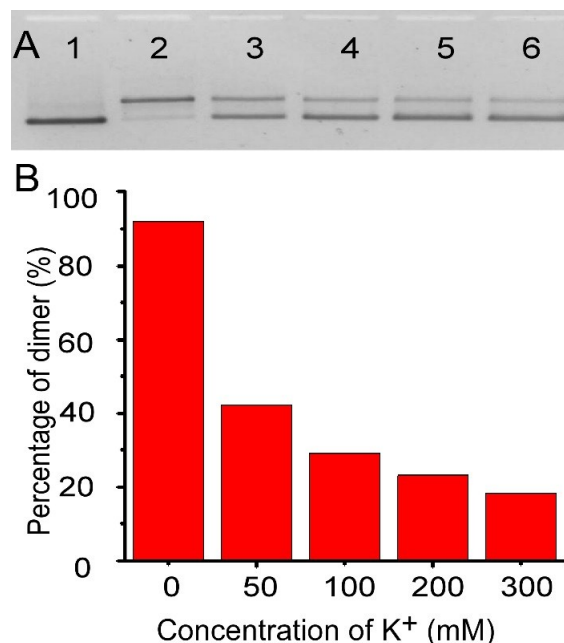

**Figure S5.** (A) Agarose gel electrophoresis image of dissociation of a DNA origami dimer with different concentrations of potassium (design corresponding to Figure 4A). Lane 1: DNA origami monomer. Lane 2: DNA origami dimer before K<sup>+</sup> treatment. Lane 3 to Lane 6 : DNA origami dimer treated with varied concentrations of K<sup>+</sup>, 50 mM, 100 mM, 200 mM, 300 mM, respectively. (B) The quantification of band intensity in an agarose gel image (shown in Figure S2A).

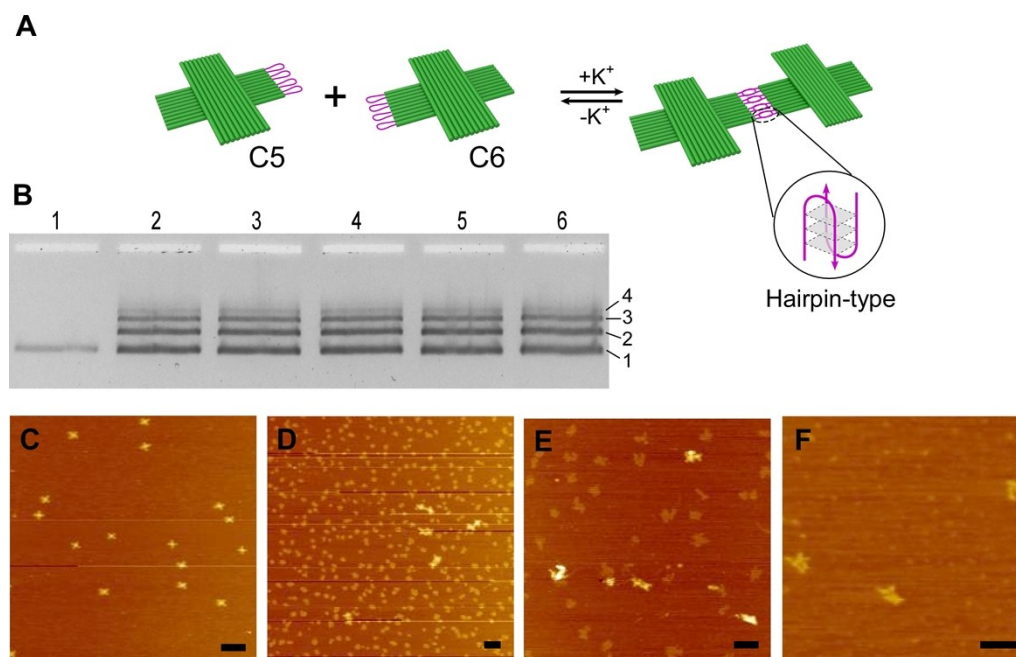

**Figure S6.** (A) Schematic drawings of a DNA origami assembly/disassembly driven by intermolecular G-quadruplex. (B) Agarose gel electrophoresis image of a DNA origami dimer with different concentrations of potassium. Lane 1: DNA origami monomer. Lane 2 to Lane 6: mixture of DNA origami with varied K<sup>+</sup> concentrations, 0 mM, 50 mM, 100 mM, 200 mM, and 300 mM, respectively. (C)-(F) AFM images corresponding to Band 1 through Band 4, respectively. Scale bar, 200nm.

## The Sticky-ends design and sequences of DNA origami:

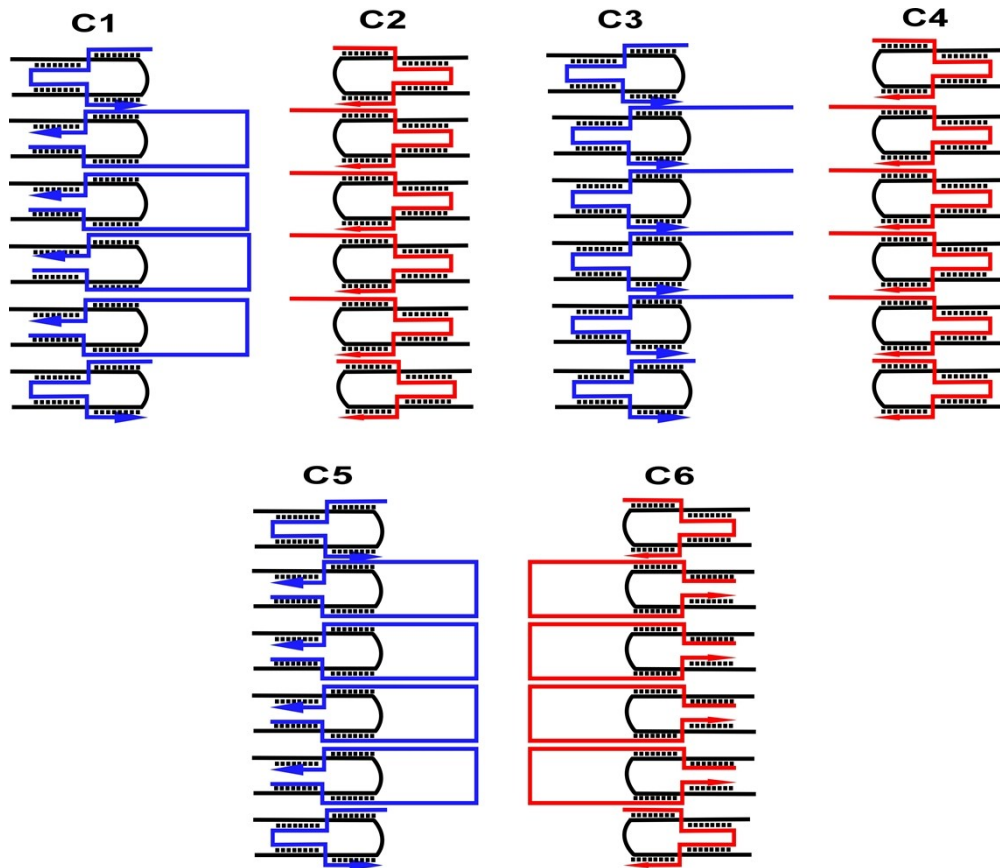

RC-M1 AGCTAATGCAGAACGCGCCTGTTTTAATATCC  
 RC-M2 CATCCTAATTTGAAGCCTTAAATCTTTTATCC  
 RC-M3 TGAATCTTGAGAGATAACCCACAAAACAATGA  
 RC-M4 AATAGCAATAGATGGGCGCATCGTACCGTATC  
 RC-M5 GGCCTCAGCTTGCATGCCTGCAGGGAATTCGT  
 RC-M6 AATCATGGTGGTTTTTCTTTTCACCCGCCTGG  
 RC-M7 CCCTGAGAGAGTTGCAGCAAGCGGGTATTGGG  
 RC-M8 CGCCAGGGTCATAGCTGTTTCTTGACGGCCA  
 RC-M9 GTGCCAAGGAAGATCGACATCCAGATAGGTTA  
 RC-M10 CGTTGGTGTAGCTATCTTACCGAATTGAGCGC  
 RC-M11 TAATATCAACCTTCGCTAACGAGCCCGACTTG  
 RC-M12 CGGGAGGTTTTACGAGCATGTAGAACATGTTC  
 RC-M13 CTGTCCAGACGACGACAATAAACAAACCAATC  
 RC-M14 AATAATCGCGTTTTAGCGAACCTCGTCTTTCC  
 RC-M15 AGAGCCTACAAAGTCAGAGGGTAAGCCCTTTT  
 RC-M16 TAAGAAAAGATTGACCGTAATGGGCCAGCTTT  
 RC-M17 CCGGCACCCACGACGTTGTA AAACTGTGAAAT  
 RC-M18 TGTTATCCGGGAGAGGCGGTTTGCTCCACGCT  
 RC-M19 GGTTCGCCCCAGCAGGCGAAAATCAATCGGCC  
 RC-M20 AACGCGCGGCTCACAAATCCACACCCAGGGTT  
 RC-M21 TTCCAGTGCTTCTGGTGCCGGAAGTGGGAAC  
 RC-M22 AAACGGCGGTAAGCAGATAGCCGAAACTGAAC  
 RC-M23 ACCCTGAAATTTGCCAGTTACAAATTCTAAGA  
 RC-M24 ACGCGAGGGCTGTCTTTCCTTATCAAGTAATT  
 RC-M25 GTACCGACAAAAGGTAATTCCAAG  
 RC-M26 AACGGGTAGAAGGCTTATCCGGTAATAAACAG  
 RC-M28 GTCGGATTCTCCACCAGGCA

RC-M30 AGCCGGAAGCCAGCTGCATTAATGCTGTTTGTATGGTGTCTTCCTGTAGCCAGCTTAAATCGATG  
 RC-M31 GCAAAATTCGGGAAACCTGTCGTGCATAAAGTGTAAAGCGATGTGCT  
 RC-M32 GCAAGGCGTTTCGCCATTACAGGCTGCGCAACTG  
 RC-M33 GGAAGCGCTTTATCCCAATCCAAAAAGCAAAT  
 RC-M34 CAGATATATTAAACCATACGGAAATTACCCAAAAGAAGCTGGCATGATTA  
 RC-M35 AGGCATTTTCGAGCCAGTACTCATCG  
 RC-M36 AGAACAAGTACCGCGCCCAATAGCTAAGAAAC  
 RC-M39 CCTAATGAACTGCCCGCTTTCCAGCCCTTATA  
 RC-M40 AATCAAAAAGAATAGCCCTTTAAATATGCATTCTACTA  
 RC-M41 GAGATAGGGTTGTGAGGATTAGAGAGTACCTATTCATT  
 RC-M42 TTGCGCTCGTGAGCTAACTCACATGATAGCCC  
 RC-M43 TATTACGCGCGGATCGGTGCGGGCGAGGATTT  
 RC-M44 CAGCCTTTGTTTAAACGTCAAAAATTTCAATT  
 RC-M45 GGAATCATCAAGCCGTTTTTATTTGTTATATA  
 RC-M46 TCGCCATATTTAAACAACGTTGCGGGGTTTTAAGCCCAA  
 RC-M47 CCAACAGTGTGTGCCCGTATAAACAGTTAACCAGAGC  
 RC-M48 ACTATATGCTCCGGCTTAGGTTGGTCATCGTA  
 RC-M51 TAAAACATCTTTAATGCGCGAACTTAATTGCG  
 RC-M52 CTATTAGTCGCCATTA AAAATACCATAGATTA  
 RC-M53 GAGCCGTCTAGACTTTACAAACAATTGACAA  
 RC-M54 AATCGCGCAAAAAGAAGTTAGTTAGCTTAAACAGCTTGATACGCCACGC  
 RC-M55 TTTTTAACTAAATGCTGATGCAAAAATTGAGAA  
 RC-M56 CAAGACAAAAATCATAGGTCTGAGACAAACAT  
 RC-M59 CACCAGCAGGCACAGATTTAATTTCTCAATCATAAGGGAAC  
 RC-M60 TGCTGGTAATATCCAGAACAATATAAGCGTAA  
 RC-M61 GAATACGTGAAGATAAAAACAGAGGATCTAAAA  
 RC-M62 TATCTTTAAAATCCTTTGCCCGAACCGCGACCTGC  
 RC-M63 CGAAACAAAGTAATAACGGA  
 RC-M64 TTCGCCTGCAAAATTAATTACATTAATAGTGA  
 RC-M65 ATTTATCAAGAACGCGAGAAAAGTATAAAGCCAATAAAGAATACAC  
 RC-M66 ATATGCGTTATACAAATCTTACCTTTTCAA  
 RC-M67 TATATTTTGACGCTGAGAAGAGTCTAACAATT  
 RC-M69 ATTTGTATCATCGCTTCTGAATTACAGTAACA  
 RC-M71 TCAGTATTAACCCTTCTGACCTGATACCGCCA  
 RC-M72 GCCATTGCAACAGGAAAAACGCTCTGGCCAAC  
 RC-M73 AGAGTAGAACACCGCCTGCAACAAAATCAAC  
 RC-M74 AGTAGAAAAGTTTGAGTAACATTA  
 RC-M75 TTTGGATTATACCTGATAAATTGTGTCGAAATCGTTATTA  
 RC-M76 GTACCTTTATTACCTTTTTTAAATGCGATAGCT  
 RC-M77 TAGATTAAGTTAATTTCGATCTTCTTAGTATC  
 RC-M78 TCATAATTACTAGAAAAAGCCTGTTGACCTAA  
 RC-M79 ATTTAATGATCCTTGAAAACATAGGAAACAGT  
 RC-M80 ACATAAATACGTCAGATGAATATATGGAAGGA  
 RC-M81 ATTGAACCAATATAATCCTGATTGTCATTTTG  
 RC-M82 CGGAACAATATCTGGTCAGTTGGCGTGCCACG  
 RC-M83 CTGAGAGCAATAAAAAGGGACATTCATGGAAAT  
 RC-M84 ACCTACATTTTGACGCTCAATCGTCAGTGCGC  
 RC-M85 CGACCAGTCAGCAGCAAATGAAAATCAAACCC  
 RC-M86 TCAATCAAAGAAACCACCAGAAGGATGATGGC  
 RC-M87 AATTCATCAACCATATCAAATTATAGATTTT  
 RC-M88 CAGGTTTACAATATATGTGAGTGATTAATTTT  
 RC-M89 CCTTAGAGTTTGAATACCGACCCACCGGAA  
 RC-M90 AAAAGGGTAAGATTGTATAAGCAAAAATTTCGC  
 RC-M91 AATAACCTTTAGAACCTCATATAAAAAGATTC  
 RC-M92 GAAAGACTCAATTCTGCGAACGAGAAATGGTC  
 RC-M93 CATAGTAATGACTATTATAGTCAGGGAAGCCC  
 RC-M94 TAACAAAGTTAGGAATACCACATTTTACGAGG  
 RC-M95 GCTGGCTGACCTTCATCAAGAGTAAATCAACG  
 RC-M96 GTTGAGATCTGCTCATTTCAGTGAAGCGCATAG  
 RC-M97 CTTTACCCGAGCAACACTATCATAATTCATCA  
 RC-M98 TTGATTCCTCAAATATCGCGTTTTAATCAGGT



RC-M99 AAAAATTTGTTTAGCTATATTTTCTGTAACAG  
RC-M100 AAAACAGGGAGAAAGGCCGAGACGCAAGGAT  
RC-M101 GTTAAATTTTTGTTAAATCAGCTCAAGCCCA  
RC-M102 CACCATCACGGTTGATAATCAGAAATTTTTTA  
RC-M103 CGCGAGCTAAGCCTTTATTTCAACAGTCAAAT  
RC-M104 CTTCAAAGTGGAAGTTTCATTCCAATTTGGGG  
RC-M105 TTACCAGAATGACCATAAATCAAAAATTCGAG  
RC-M106 GCCCTGACTATTACAGGTAGAAAGACCCTCGT  
RC-M107 ACAGATGAACGGTGTACAGACCAGTAAGGCTT  
RC-M108 AACAAATGAGAACACCAGAACGAGAAAGAGG  
RC-M110 ACGGTGTCCGAACCAGACCGGAAGAGTTCAGA  
RC-M112 ATGTACCCATATGATATTCAACCGAATACTTT  
RC-M113 ACCAATAGGAACGCCATCAAAAATTCATCAT  
RC-M114 GATAAATTTTCGTAAAACCTAGCATGAATTCGCGTCTGGCTGTTCCGAAATCG  
RC-M115 ATAGTAGTAACATTATGACCCTGTTTCTAGCT  
RC-M116 CAAACTCCAACAGTTGAGTGTGTTTCGTAGAAGAACTCAAACCTTTGAATGG  
RC-M117 GAGGCTTTCTCAAATGCTTTAAAC  
RC-M118 TTGGGCTTTACGTTAATAAAAACGAAATAGCGA  
RC-M119 CGAACTGACCAACTTTGTAGTAAA  
RC-M120 GAAAAATCGAGATGGTTCAATATTTATCGGCCT  
RC-M123 AACGGTAAAATGCCGAGAGGGTAAATCGGTT  
RC-M124 TAAATGTGAGCGAGTAACAACCTAAGGAAACCGAGGAAA  
RC-M125 CTGGAGCAAACAAGAGCATCAACA  
RC-M126 CTGAATCTAAATCATAACAGGCAAGTCAGAGCATGAAAGGGGCTGGGGTG  
RC-M127 GGTAATAGGCGGAATCGTCATAAATTTAATTGCTCCTTTTCTTAATTG  
RC-M128 TCATTGTGTTATACCAGTCAGGACCCAGAGGG  
RC-M129 AACGAGGCGCAGACGGAACCTTAA  
RC-M130 CTGGCTCAAATTACCTTATGCGATAATGACAA  
RC-M132 GCTTAGAGGATAAGAGGTCATTTTTGAAACAT  
RC-M134 CTGAGAGTCTACAAAGGCTATCAGACTTGAGC  
RC-M135 CATTTGGGATTATCACCGTCACCGGTCATTGC  
RC-M136 CTCAGAGCACCGCCACCCTCAGAGATTAAGCA  
RC-M137 GAAAGTATTCGGAACCTATTATTCTGCGGATG  
RC-M138 CCACAGACACAAACTACAACGCCTGATAGCGT  
RC-M139 CAACCATCCGATAGTTGCGCCGACTTTAAGAA  
RC-M140 ATAACCGATCATCTTTGACCCCCAGCGATTATACCAAGTTCATGTTACTTAGCCGG  
RC-M142 TGCCTATTTAAGAGGCTGAGACTCGAGTTTCG  
RC-M144 AAAGGTGAAATTAGAGCCAGCAAAGCCGCCA  
RC-M145 CGCAATAATAACGGAATATTCATT  
RC-M146 TAGCACCAAAATATTGTAGTACCGCAATAAGAGAATATAAA  
RC-M147 CGCCGCCAGAACCGCCTCCCTCAGATCACCAG  
RC-M148 CTAAGTTTATGTACCGTAACACTCTCAAGAGAAGGATTAGGATTA  
RC-M149 TAAAACACTATATTCGGTCGCTGATTTTCGAGGAGAATTTTCGTAACGAT  
RC-M150 GGGAGTTAAACGAAAGAGGCGTCGCTCAACAGTAGGGCTTATCCAATCG  
RC-M153 AGACTCCTTTGAGGGAGGGAAGGTTTACCATTAGCAAGGCACCAGAGC  
RC-M154 AGTATGTTAGCAAACGTAGAAAATGCGCCAAA  
RC-M155 TCACCAATGGCGACATTCAACCGATATTACGC  
RC-M156 TCAGACGAAATCAAAATCACCGGACGGAAACG  
RC-M157 CCAGGCGGTTTTAACGGGGTCAGTGAGGCAGG  
RC-M158 AATGAATTCATTTTCAGGGATAGCGCTCAGTA  
RC-M159 TTTTTCGGGAGCCTTTAATTGTATCGTTAGTA  
RC-M160 GCCACTACGAAGGCACCAACCTAAAAGGCCGC  
RC-M161 TCCAAAAGGATCGTCACCCTCAGCTACGTAAT  
RC-M162 ACCACCCTTTCTGTATGGGATTTTAAAAAGGC  
RC-M163 GTAATAAGATAAGTGCCGTCGAGATCAGAGCC  
RC-M164 CTTTTCATTTGGCCTTGATATTCAGTGTACTG  
RC-M165 GACAAAAGGAAACCATCGATAGCATTGCCAT  
RC-M166 AAAGGTGGCAACATATAAAAAGAAACACAATCA  
RC-M167 ATCAGTAGTTCATATGGTTTACCAACATACAT  
RC-M168 TGGATCTTAGCCCCCTTATTAGCGGCACCGTA  
RC-M169 ATAAGTATTTTTGATGATACAGGACAAACGAA

RC-M170 ACTTTCAACTCAGAACCGCCACCCGGGTTGAT  
 RC-M171 ACAGCATCGTTGAAAATCTCCAAAGCTAAACA  
 RC-M172 GAAGTTTCCATTAAACGGGTAAAAAGCGAAAG  
 RC-M173 TTTTTCACGGAACGAGGGTAGCAATTCATGAG  
 RC-M174 CCGCCACCCAGTTTCAGCGGAGTGATAATAAT  
 RC-M175 TACATGGCAGCCCGGAATAGGTGTCCTCAGAA  
 RC-M176 TCGGTCATCATTAAAGCCAGAATGAAGCGTCA  
 RC-M177 ATAGAAAACGACAGAATCAAGTTTCGGCATT  
 RC-M27-AS CCATATTAATTAGACGGGAGAATTACAAAGTTACC  
 RC-M29-AS AAGCGCCAATTAAGTTGGGTAAACGAACATACG  
 RC-M37-AS GATTTTTTACAGAGAGAATAACATAAAAAACAG  
 RC-M38-AS TTGGGAAGCAGCTGGCTTAAAGCTAGCTATTTTTGAGAGAT  
 RC-M49-AS ACCTGAGCAGAGGCGAATTATTCAGAAAAATAG  
 RC-M50-AS AGAAGTATAATAGATAATACATTTCTCTTCGC  
 RC-M57-AS CAAGAAAAATTGCTTTGAATACCAAGTTACAA  
 RC-M58-AS CTCGTATTGGTGCACCTAACAACACTAGAACGAAC  
 RC-M68-AS TGATTTGATACATCGGGAGAAACACAACGGAG  
 RC-M70-AS ATTTTAAAGGAATTGAGGAAGGTTTGGGCGG  
 RC-M109-AS AAACGAGACGACGATAAAAACCAAATAACGG  
 RC-M111-AS TGCGGGAGGAAAAGGTGGCATCAAATAAAGT  
 RC-M121-AS GAATCCCCTGCAAAAAGAAGTTTTGGTTGGGAA  
 RC-M131-AS CCAATACTTAAAATGTTTAGACTGGTAGCATT  
 RC-M133-AS ATAAAGCCGCAAAGAATTAGCAAACCACCACC  
 RC-M141-AS TCACCAGTAGCCCTCATATGATGAAAGACTACC  
 RC-M143-AS CCCTCAGACGCCACCAGAACCACCATGCCCCC  
 RC-M122-AS GTACCAAAAGCATTAAACATCCAATGGTGCTGTAGCTCAACATGTTT  
 RC-M151-AS TAGGAACCTTGTCTCTTTCCAGACGGTTATCAGCTTGC GGCTTGCA  
 RC-M152-AS CACCACCGGCATTGACAGGAGGTTGCCTTGAGTAACATAATTTAGGCAG

**Modified DNA sequences corresponding to the design of Figure 1:**

Loop GQ1 TAACCTTGCTTCTGTTTTTGGGTTAGGGTTAGGGTTAGGGTTTTTAATCGTCGCTATTAA  
 Loop GQ2 TAGCACGTAAAACATTTTTGGGTTAGGGTTAGGGTTAGGGTTTTTAATAAAGAAATTGCG  
 Loop GQ3 GCGGAATTATCATCTTTTTGGGTTAGGGTTAGGGTTAGGGTTTTTATTCTGATTATCAG  
 Loop GQ4 TCTAAAGCATCACCTTTTTGGGTTAGGGTTAGGGTTAGGGTTTTTGCTGAACCTCAAATA  
 Blunt RE1 TTTTGTAAATAAGAATAAAGTGTGATAAATAAGGCTTTT  
 Blunt RE6 TTTTACATTGGCAGATTCACCTGAAATGGATTATTTTTTT  
 Loop Complementary G1 CCTAACCCTTTTTTGAGTAATGTGTAGGTTTTTAAATGCAATGCCTTTTT  
 Loop Complementary G2 CCTAACCCTTTTTATTAGATACATTTTCGCTAGATTTAGTTTGACCTTTTT  
 Loop Complementary G3 CCTAACCCTTTTTATCAAAAAGATTAAGAAAGCAAAGCGGATTGCTTTTT  
 Loop Complementary G4 CCTAACCCTTTTTATAACGCCAAAAGGAACAACCTAATGCAGATACTTTTT  
 Blunt DE1 TTTTCGTAAATATTTTGTAAATATTTAAATTGTAATTTT  
 Blunt DE6 TTTTGGATATTCATTACCCAATCTTCGACAAGAACCCTTTT

**Modified DNA sequences corresponding to the design of Figure 4:**

Linear GQ1 GGGTTAGGGTTAGGGTTAGGGTTTTAAATCGTCGCTATTAAATAACCTTGCTTCTGTTTT  
 Linear GQ2 GGGTTAGGGTTAGGGTTAGGGTTTTAAATAAAGAAATTGCGTTAGCACGTAAAACAGTTT  
 Linear GQ3 GGGTTAGGGTTAGGGTTAGGGTTTTTATTCTGATTATCAGAGCGGAATTATCATCATT  
 Linear GQ4 GGGTTAGGGTTAGGGTTAGGGTTTTTGCTGAACCTCAAATAATCTAAAGCATCACCTTTT  
 Linear Complementary G1 CCTAACCCTTTTTTGAGTAATGTGTAGGTTTTTAAATGCAATGCCTTTTT  
 Linear Complementary G2 CCTAACCCTTTTTATTAGATACATTTTCGCTAGATTTAGTTTGACCTTTTT  
 Linear Complementary G3 CCTAACCCTTTTTATCAAAAAGATTAAGAAAGCAAAGCGGATTGCTTTTT  
 Linear Complementary G4 CCTAACCCTTTTTATAACGCCAAAAGGAACAACCTAATGCAGATACTTTTT  
 Blunt DE1 TTTTCGTAAATATTTTGTAAATATTTAAATTGTAATTTT  
 Blunt DE6 TTTTGGATATTCATTACCCAATCTTCGACAAGAACCCTTTT  
 Blunt RE1 TTTTGTAAATAAGAATAAAGTGTGATAAATAAGGCTTTT  
 Blunt RE6 TTTTACATTGGCAGATTCACCTGAAATGGATTATTTTTTT

**Modified DNA sequences corresponding to design in Figure S6 (G3):**

Blunt RE1 TTTTGTAAATAAGAATAAAGTGTGATAAATAAGGCTTTT  
 Short G LEFT1 ATAACCTTGCTTCTGTTTTTTGGGTTAGGGTTTTTAAATCGTCGCTATTAA

Short G LEFT2 TTAGCACGTAAAACAGTTTTTGGGTTAGGGTTTTTAAATAAAGAAATTGCG  
 Short G LEFT3 AGCGGAATTATCATCATTTTTGGGTTAGGGTTTTTATTCCTGATTATCAG  
 Short G LEFT4 ATCTAAAGCATCACCTTTTTGGGTTAGGGTTTTTGTGAACCTCAAATA  
 Blunt RE6 TTTTACATTGGCAGATTCACCTGAAATGGATTATTTTTTT  
 Blunt DE1 TTTTCGTTAATATTTTGTTAATATTTAAATTGTAAATTTT  
 Short G RIGHT1 TTTTAAATGCAATGCCTTTTTGGGTTAGGGTTTTTGTAGTAATGTGTAGGT  
 Short G RIGHT2 TAGATTTAGTTTGACCTTTTTGGGTTAGGGTTTTTATTAGATACATTTTCGC  
 Short G RIGHT3 AAGCAAAGCGGATTGCTTTTTGGGTTAGGGTTTTTATCAAAAAGATTAAGA  
 Short G RIGHT4 CAACTAATGCAGATACTTTTTGGGTTAGGGTTTTTATAACGCCAAAAGGAA  
 Blunt DE6 TTTTGGATATTCATTACCCAATCTTCGACAAGAACCTTTT

**Modified DNA sequences corresponding to design in Figure S6 (G9):**

Blunt RE1 TTTTGTAAATAAGAATAAAGTGTGATAAATAAGGCTTTT  
 Full G LEFT1 ATAACCTTGCTTCTGTTTTGGGGGGGGGTTTTGGGGGGGGGTTTAAATCGTCGCTATTAA  
 Full G LEFT2 TTAGCACGTAAAACAGTTTGGGGGGGGGTTTTGGGGGGGGGTTTAAATAAAGAAATTGCG  
 Full G LEFT3 AGCGGAATTATCATCATTTTGGGGGGGGGTTTTGGGGGGGGGTTTATTCCTGATTATCAG  
 Full G LEFT4 ATCTAAAGCATCACCTTTTTGGGGGGGGGTTTTGGGGGGGGGTTTGTGAACCTCAAATA  
 Blunt RE6 TTTTACATTGGCAGATTCACCTGAAATGGATTATTTTTTT  
 Blunt DE1 TTTTCGTTAATATTTTGTTAATATTTAAATTGTAAATTTT  
 Full G RIGHT1 TTTTAAATGCAATGCCTTTGGGGGGGGGTTTTGGGGGGGGGTTTTGAGTAATGTGTAGGT  
 Full G RIGHT2 TAGATTTAGTTTGACCTTTGGGGGGGGGTTTTGGGGGGGGGTTTATTAGATACATTTTCGC  
 Full G RIGHT3 AAGCAAAGCGGATTGCTTTGGGGGGGGGTTTTGGGGGGGGGTTTATCAAAAAGATTAAGA  
 Full G RIGHT4 CAACTAATGCAGATACTTTGGGGGGGGGTTTTGGGGGGGGGTTTATAACGCCAAAAGGAA  
 Blunt DE6 TTTTGGATATTCATTACCCAATCTTCGACAAGAACCTTTT
